# Supplementary material for: Amidinate–carboxylate complexes of dimolybdenum and ditungsten: M2(O2CR)2((NiPr)2CR′)2. Preparations, molecular and electronic structures and reactions
Source: Royal Society of Chemistry journal article supplement (doi:10.1039/b715258b), 2008-01-01
Supplement: b715258b.pdf [file b715258b.pdf]

Amidinate-Carboxylate Complexes of Dimolybdenum and Ditungsten:  $M_2(O_2CR)_2((N^iPr)_2CR')_2$ .

Preparations, Molecular and Electronic Structures and Reactions.

Douglas J. Brown, Malcolm H. Chisholm\*, and Judith C. Gallucci

Department of Chemistry

The Ohio State University

Columbus, OH 43210

Table of Contents

|                                                    |        |
|----------------------------------------------------|--------|
| Figure S1.....                                     | pg 1   |
| Figure S2.....                                     | pg 2   |
| Table S1.....                                      | pg 2-3 |
| Table S2.....                                      | pg 3-4 |
| Attempted Synthesis of Higher Order Oligomers..... | pg 4-6 |

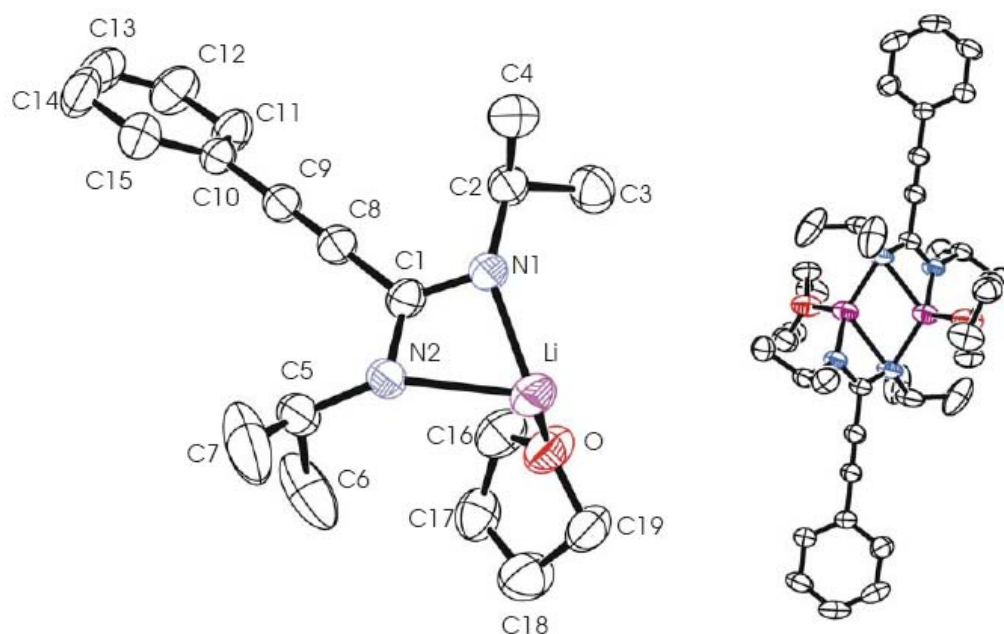

**Figure S1.** ORTEP diagram of asymmetric unit (left) and centrosymmetric dimer (right) of  $\text{Li}[(\text{N}^i\text{Pr})_2\text{CC}\equiv\text{CPh}]$  with coordinating THF drawn with 50% probability displacement ellipsoids. Hydrogen atoms are omitted for clarity.

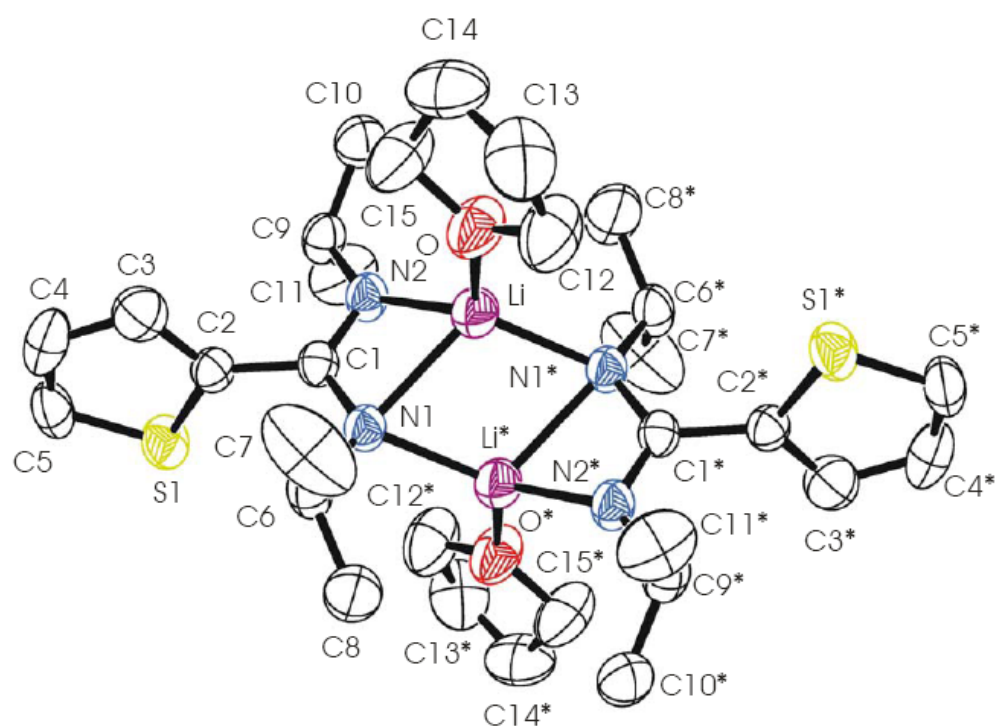

**Figure S2.** ORTEP diagram of centrosymmetric dimer of  $\text{Li}[(\text{N}^i\text{Pr})_2\text{C}-2\text{-C}_4\text{H}_4\text{S}]$  with coordinating THF drawn with 50% probability displacement ellipsoids. Hydrogen atoms are omitted for clarity. The starred atoms (\*) are related to the unstarred atom by the crystallographic inversion center.

**TABLE 1: CRYSTALLOGRAPHIC DETAILS**

|                             | $\text{Li}[(\text{N}^i\text{Pr})_2\text{C}\equiv\text{C}$<br>$\text{Ph}]$                                                                           | $\text{Li}[(\text{N}^i\text{Pr})_2\text{CC}_4\text{H}_4$<br>$\text{S}]$                 | $\text{Mo}_2(\text{O}_2\text{CCH}_3)_2((\text{N}^i\text{Pr})_2\text{C}$<br>$\text{Me})_2$                                                               | $\text{Mo}_2(\text{O}_2\text{CCH}_3)_2((\text{N}^i\text{Pr})_2\text{C}\equiv\text{C}$<br>$\text{Ph})_2$                                             |
|-----------------------------|-----------------------------------------------------------------------------------------------------------------------------------------------------|-----------------------------------------------------------------------------------------|---------------------------------------------------------------------------------------------------------------------------------------------------------|-----------------------------------------------------------------------------------------------------------------------------------------------------|
| <b>Molecular formula</b>    | $\text{C}_{38}\text{H}_{54}\text{Li}_2\text{N}_4$<br>$\text{O}_2$                                                                                   | $\text{C}_{15}\text{H}_{25}\text{Li}\text{N}_2$<br>$\text{O}\text{S}$                   | $\text{C}_{20}\text{H}_{40}\text{Mo}_2\text{N}_4\text{O}_4$                                                                                             | $\text{C}_{34}\text{H}_{44}\text{Mo}_2\text{N}_4\text{O}_4$ and 3<br>THFs                                                                           |
| <b>Formula weight</b>       | 612.73                                                                                                                                              | 288.37                                                                                  | 592.44                                                                                                                                                  | 980.92                                                                                                                                              |
| <b>Temperature</b>          | 200(2) K                                                                                                                                            | 200(2) K                                                                                | 150(2) K                                                                                                                                                | 200(2) K                                                                                                                                            |
| <b>Wavelength</b>           | 0.71073 Å                                                                                                                                           | 0.71073 Å                                                                               | 0.71073 Å                                                                                                                                               | 0.71073 Å                                                                                                                                           |
| <b>Crystal system</b>       | Triclinic                                                                                                                                           | Monoclinic                                                                              | Triclinic                                                                                                                                               | Triclinic                                                                                                                                           |
| <b>Space group</b>          | $\text{P}\bar{1}$                                                                                                                                   | $\text{P}2_1/\text{c}$                                                                  | $\text{P}\bar{1}$                                                                                                                                       | $\text{P}\bar{1}$                                                                                                                                   |
| <b>Unit cell dimensions</b> | $a = 9.724(1)$ Å<br>$\alpha = 93.575(5)^\circ$<br>$b = 10.008(1)$ Å<br>$\beta = 91.225(5)^\circ$<br>$c = 19.713(2)$ Å<br>$\gamma = 90.848(4)^\circ$ | $a = 9.173(1)$ Å<br>$b = 10.970(1)$ Å<br>$\beta = 95.953(7)^\circ$<br>$c = 17.190(2)$ Å | $a = 8.3023(10)$ Å<br>$\alpha = 68.840(4)^\circ$<br>$b = 9.0596(10)$ Å<br>$\beta = 77.080(4)^\circ$<br>$c = 9.5252(10)$ Å<br>$\gamma = 65.805(5)^\circ$ | $a = 9.311(1)$ Å<br>$\alpha = 66.083(3)^\circ$<br>$b = 11.735(1)$ Å<br>$\beta = 74.895(3)^\circ$<br>$c = 12.973(1)$ Å<br>$\gamma = 68.780(5)^\circ$ |
| <b>Volume</b>               | $1914.0(3)$ Å <sup>3</sup>                                                                                                                          | $1720.5(3)$ Å <sup>3</sup>                                                              | $607.03(12)$ Å <sup>3</sup>                                                                                                                             | $1197.1(2)$ Å <sup>3</sup>                                                                                                                          |

|                                           |                                                  |                                                  |                                                |                                                |
|-------------------------------------------|--------------------------------------------------|--------------------------------------------------|------------------------------------------------|------------------------------------------------|
| <b>Z</b>                                  | 2                                                | 4                                                | 1                                              | 1                                              |
| <b>Density (calculated)</b>               | 1.063 Mg/m <sup>3</sup>                          | 1.113 Mg/m <sup>3</sup>                          | 1.621 Mg/m <sup>3</sup>                        | 1.361 Mg/m <sup>3</sup>                        |
| <b>Absorption coefficient</b>             | 0.065 mm <sup>-1</sup>                           | 0.185 mm <sup>-1</sup>                           | 1.065 mm <sup>-1</sup>                         | 0.574 mm <sup>-1</sup>                         |
| <b>F(000)</b>                             | 664                                              | 624                                              | 304                                            | 512                                            |
| <b>Crystal size</b>                       | 0.27 x 0.35 x<br>0.38 mm <sup>3</sup>            | 0.15 x 0.23 x<br>0.31 mm <sup>3</sup>            | 0.19 x 0.31 x 0.38 mm <sup>3</sup>             | 0.15 x 0.31 x 0.38 mm <sup>3</sup>             |
| <b>Theta range for data collection</b>    | 2.04 to 25.05 °                                  | 2.21 to 25.04 °                                  | 2.99 to 27.46 °                                | 2.74 to 27.44 °                                |
| <b>Index ranges</b>                       | -11 ≤ h ≤ 11, -<br>11 ≤ k ≤ 11, -<br>23 ≤ l ≤ 23 | -10 ≤ h ≤ 10, -<br>13 ≤ k ≤ 13, -<br>20 ≤ l ≤ 20 | -10 ≤ h ≤ 10, -11 ≤ k ≤ 11, -<br>12 ≤ l ≤ 12   | -12 ≤ h ≤ 11, -15 ≤ k ≤ 15, -<br>16 ≤ l ≤ 16   |
| <b>Reflections collected</b>              | 36676                                            | 27382                                            | 17872                                          | 32426                                          |
| <b>Independent reflections</b>            | 6769 [R(int) =<br>0.028]                         | 3031 [R(int) =<br>0.036]                         | 2771 [R(int) = 0.027]                          | 5452 [R(int) = 0.028]                          |
| <b>Refinement method</b>                  | Full-matrix least-<br>squares on F <sup>2</sup>  | Full-matrix least-<br>squares on F <sup>2</sup>  | Full-matrix least-squares<br>on F <sup>2</sup> | Full-matrix least-squares on<br>F <sup>2</sup> |
| <b>Data/restraints/parameters</b>         | 6769 / 2 / 428                                   | 3031 / 9 / 221                                   | 2771 / 0 / 136                                 | 5452 / 4 / 273                                 |
| <b>Goodness-of-fit on F<sup>2</sup></b>   | 1.007                                            | 1.040                                            | 1.084                                          | 1.036                                          |
| <b>Final R indices<br/>[I &gt; 2σ(I)]</b> | R1 = 0.0518,<br>wR2 = 0.1348                     | R1 = 0.0472,<br>wR2 = 0.1249                     | R1 = 0.0169, wR2 =<br>0.0432                   | R1 = 0.0300, wR2 = 0.0797                      |
| <b>R indices (all data)</b>               | R1 = 0.0676,<br>wR2 = 0.1471                     | R1 = 0.0659,<br>wR2 = 0.1361                     | R1 = 0.0180, wR2 =<br>0.0436                   | R1 = 0.0336, wR2 = 0.0818                      |
| <b>Largest diff. peak and<br/>hole</b>    | 0.184 and -0.248<br>e/Å <sup>3</sup>             | 0.189 and -0.185<br>e/Å <sup>3</sup>             | 0.345 and -0.436 e/Å <sup>3</sup>              | 0.774 and -0.742 e/Å <sup>3</sup>              |

**TABLE 2: CRYSTALLOGRAPHIC DETAILS**

|                             |                                                                                                                           |                                                                                                                            |                                                                                                                           |                                                                                                                                                         |
|-----------------------------|---------------------------------------------------------------------------------------------------------------------------|----------------------------------------------------------------------------------------------------------------------------|---------------------------------------------------------------------------------------------------------------------------|---------------------------------------------------------------------------------------------------------------------------------------------------------|
|                             | W <sub>2</sub> (O <sub>2</sub> CCH <sub>3</sub> ) <sub>2</sub> ((<br>N <sup>i</sup> Pr) <sub>2</sub> CC≡CPh) <sub>2</sub> | Mo <sub>2</sub> (O <sub>2</sub> CCH <sub>3</sub> ) <sub>2</sub> ((<br>N <sup>i</sup> Pr) <sub>2</sub> CC≡CFc) <sub>2</sub> | W <sub>2</sub> (O <sub>2</sub> CCH <sub>3</sub> ) <sub>2</sub> ((N <sup>i</sup> Pr) <sub>2</sub> CC<br>≡CFc) <sub>2</sub> | Mo <sub>2</sub> ( <i>cis</i> -μ-O <sub>2</sub> C-9-<br>anthracene) <sub>2</sub> (η <sup>2</sup> -<br>(N <sup>i</sup> Pr) <sub>2</sub> CMe) <sub>2</sub> |
| <b>Molecular formula</b>    | C <sub>34</sub> H <sub>44</sub> N <sub>4</sub> O <sub>4</sub><br>W <sub>2</sub>                                           | C <sub>42</sub> H <sub>52</sub> Fe <sub>2</sub><br>Mo <sub>2</sub> N <sub>4</sub> O <sub>4</sub> and<br>4 THFs             | C <sub>42</sub> H <sub>52</sub> Fe <sub>2</sub> N <sub>4</sub> O <sub>4</sub> W <sub>2</sub><br>and 4 THFs                | C <sub>46</sub> H <sub>52</sub> Mo <sub>2</sub> N <sub>4</sub> O <sub>4</sub> and<br>THF                                                                |
| <b>Formula weight</b>       | 940.43                                                                                                                    | 1268.87                                                                                                                    | 1444.69                                                                                                                   | 988.90                                                                                                                                                  |
| <b>Temperature</b>          | 150(2) K                                                                                                                  | 200(2) K                                                                                                                   | 150(2) K                                                                                                                  | 150(2) K                                                                                                                                                |
| <b>Wavelength</b>           | 0.71073 Å                                                                                                                 | 0.71073 Å                                                                                                                  | 0.71073 Å                                                                                                                 | 0.71073 Å                                                                                                                                               |
| <b>Crystal system</b>       | Triclinic                                                                                                                 | Triclinic                                                                                                                  | Triclinic                                                                                                                 | Monoclinic                                                                                                                                              |
| <b>Space group</b>          | P $\bar{1}$                                                                                                               | P $\bar{1}$                                                                                                                | P $\bar{1}$                                                                                                               | P2 <sub>1</sub> /n                                                                                                                                      |
| <b>Unit cell dimensions</b> | a = 8.279(1) Å                                                                                                            | a = 11.135(1) Å                                                                                                            | a = 11.051(1) Å α =                                                                                                       | a = 21.482(2) Å                                                                                                                                         |

|                                            |                                                                            |                                                                            |                                                                        |                                                                        |                   |
|--------------------------------------------|----------------------------------------------------------------------------|----------------------------------------------------------------------------|------------------------------------------------------------------------|------------------------------------------------------------------------|-------------------|
|                                            | $\alpha = 75.741(6)^\circ$                                                 | $\alpha = 67.157(1)^\circ$                                                 | $67.331(4)^\circ$                                                      | $b = 9.609(1) \text{ \AA}$                                             | $\beta =$         |
|                                            | $b = 9.371(1) \text{ \AA}$                                                 | $b = 11.862(1) \text{ \AA}$                                                | $b = 11.816(1) \text{ \AA}$                                            | $\beta =$                                                              | $97.633(4)^\circ$ |
|                                            | $\beta = 71.498(6)^\circ$                                                  | $\beta = 78.161(1)^\circ$                                                  | $77.860(4)^\circ$                                                      | $c = 22.527(3) \text{ \AA}$                                            |                   |
|                                            | $c = 12.082(1) \text{ \AA}$                                                | $c = 12.321(1) \text{ \AA}$                                                | $c = 12.251(1) \text{ \AA}$                                            | $\gamma =$                                                             |                   |
|                                            | $\gamma = 78.558(5)^\circ$                                                 | $\gamma = 85.503(1)^\circ$                                                 | $85.531(4)^\circ$                                                      |                                                                        |                   |
| <b>Volume</b>                              | $854.1(2) \text{ \AA}^3$                                                   | $1468.0(2) \text{ \AA}^3$                                                  | $1443.1(2) \text{ \AA}^3$                                              | $4608.65(9) \text{ \AA}^3$                                             |                   |
| <b>Z</b>                                   | 1                                                                          | 1                                                                          | 1                                                                      | 4                                                                      |                   |
| <b>Density (calculated)</b>                | $1.828 \text{ Mg/m}^3$                                                     | $1.435 \text{ Mg/m}^3$                                                     | $1.662 \text{ Mg/m}^3$                                                 | $1.425 \text{ Mg/m}^3$                                                 |                   |
| <b>Absorption coefficient</b>              | $6.770 \text{ mm}^{-1}$                                                    | $0.956 \text{ mm}^{-1}$                                                    | $4.521 \text{ mm}^{-1}$                                                | $0.595 \text{ mm}^{-1}$                                                |                   |
| <b>F(000)</b>                              | 456                                                                        | 660                                                                        | 724                                                                    | 2048                                                                   |                   |
| <b>Crystal size</b>                        | $0.12 \times 0.19 \times$<br>$0.27 \text{ mm}^3$                           | $0.12 \times 0.27 \times$<br>$0.27 \text{ mm}^3$                           | $0.15 \times 0.38 \times 0.38 \text{ mm}^3$                            | $0.08 \times 0.15 \times 0.23 \text{ mm}^3$                            |                   |
| <b>Theta range for data collection</b>     | $2.62$ to $27.51^\circ$                                                    | $2.35$ to $27.51^\circ$                                                    | $2.55$ to $27.48^\circ$                                                | $2.33$ to $27.47^\circ$                                                |                   |
| <b>Index ranges</b>                        | $-10 \leq h \leq 10$ , -<br>$12 \leq k \leq 12$ , -<br>$15 \leq l \leq 15$ | $-14 \leq h \leq 14$ , -<br>$15 \leq k \leq 15$ , -<br>$15 \leq l \leq 16$ | $-14 \leq h \leq 14$ , $-15 \leq k \leq 15$ , -<br>$15 \leq l \leq 15$ | $-27 \leq h \leq 27$ , $-12 \leq k \leq 12$ , -<br>$29 \leq l \leq 29$ |                   |
| <b>Reflections collected</b>               | 26489                                                                      | 40640                                                                      | 40553                                                                  | 82643                                                                  |                   |
| <b>Independent reflections</b>             | 3913 [R(int) =<br>0.042]                                                   | 6736 [R(int) =<br>0.033]                                                   | 6607 [R(int) = 0.051]                                                  | 10574 [R(int) = 0.083]                                                 |                   |
| <b>Refinement method</b>                   | Full-matrix least-squares on $F^2$                                         | Full-matrix least-squares on $F^2$                                         | Full-matrix least-squares on $F^2$                                     | Full-matrix least-squares on $F^2$                                     |                   |
| <b>Data/restraints/parameters</b>          | 3913 / 0 / 199                                                             | 6736 / 16 / 314                                                            | 6607 / 4 / 284                                                         | 10574 / 0 / 560                                                        |                   |
| <b>Goodness-of-fit on <math>F^2</math></b> | 1.065                                                                      | 1.042                                                                      | 1.039                                                                  | 1.035                                                                  |                   |
| <b>Final R indices</b>                     | $R1 = 0.0169$ ,                                                            | $R1 = 0.0422$ ,                                                            | $R1 = 0.0331$ , $wR2 =$                                                | $R1 = 0.0528$ , $wR2 = 0.1141$                                         |                   |
| <b>[<math>I &gt; 2\sigma(I)</math>]</b>    | $wR2 = 0.0398$                                                             | $wR2 = 0.1174$                                                             | $0.0841$                                                               |                                                                        |                   |
| <b>R indices (all data)</b>                | $R1 = 0.0190$ ,                                                            | $R1 = 0.0540$ ,                                                            | $R1 = 0.0413$ , $wR2 =$                                                | $R1 = 0.0968$ , $wR2 = 0.1287$                                         |                   |
| <b>Largest diff. peak and hole</b>         | $1.152$ and $-1.393$<br>$e/\text{\AA}^3$                                   | $1.232$ and $-0.738$<br>$e/\text{\AA}^3$                                   | $2.022$ and $-1.251 e/\text{\AA}^3$                                    | $2.085$ and $-0.598 e/\text{\AA}^3$                                    |                   |

**Attempted preparation of  $[-\text{Mo}_2(\text{N}^i\text{Pr})_2\text{CC}\equiv\text{CC}_6\text{H}_4)_2(\text{O}_2\text{CPhCO}_2)_n-$ .** 230 mg of **3A** and 50 mg of terephthalic acid were mixed at room temperature in approximately 25 mL of ethanol. The solution was red in color and showed suspended white terephthalic acid. After 20 days, the solution remained red

but no terephthalic acid was visible. The mixture was centrifuged; the solvent was cannulated off, and the remaining solid was dried under vacuum. Analysis by MALDI-MS indicated low molecular weight oligomers with one, two, or three  $M_2$  repeating units.

Microanalysis found: C 50.94; H 4.88; N 6.55%.  $C_{38}H_{42}N_4O_4Mo_2$  requires: C 56.30; H 5.22; N 6.91%.

Solvent 1: 230 mg of *trans*- $Mo_2(O_2CCH_3)_2((N^iPr)_2CC\equiv CPh)_2$  (0.3 mmol) and 50 mg of terephthalic acid (0.3 mmol) were mixed at room temperature in approximately 25 mL of THF. The solution was red in color with a white suspension of terephthalic acid. After 20 days, the solution remained red but no terephthalic acid was visible. The mixture was centrifuged; the solvent was cannulated off, and the remaining solid was dried under vacuum.  $^1H$  NMR spectrum indicated a mixture of products with overlapping resonances. Analysis by MALDI-TOF indicated low molecular weight oligomers with mono-, di-, tri- or tetra- $Mo_2$  units.

Solvent 2: This reaction was carried out under similar conditions outlined for the initial reaction using 230 mg of *trans*- $Mo_2(O_2CCH_3)_2((N^iPr)_2CC\equiv CPh)_2$  (0.3 mmol) and 50 mg of terephthalic acid (0.3 mmol) in approximately 25 mL of ethanol. A red solid was isolated by centrifugation.  $^1H$  NMR spectrum indicated a mixture of products with overlapping resonances. Analysis by MALDI-TOF indicated low molecular weight oligomers with mono-, di, and tri- $Mo_2$  units. No elemental analysis was conducted.

Solvent 3: This reaction was carried out under similar conditions outlined for the initial reaction using 230 mg of *trans*- $Mo_2(O_2CCH_3)_2((N^iPr)_2CC\equiv CPh)_2$  (0.3 mmol) and 50 mg of terephthalic acid in approximately 25 mL of hexanes. A red solid was isolated by centrifugation.  $^1H$  NMR spectrum indicated a mixture of products with overlapping resonances. Analysis by MALDI-TOF indicated low molecular weight oligomers with mono- and di- $Mo_2$  units.

Microanalysis found: C 55.25; H 5.51; N 6.59%.  $C_{72}H_{86}N_8O_8Mo_4$  (simple pairs of dimers) requires: C 54.90; H 5.50; N 7.11%.

**Attempted preparation of  $[trans-Mo_2((N^iPr)_2CC\equiv CPh)_2]^{2+}$ .**

Method A: To a solution of 380 mg of  $trans-Mo_2(O_2CCH_3)_2((N^iPr)_2CC\equiv CPh)_2$  (0.5 mmol) in 10 mL of  $CH_2Cl_2$  and 2.5 mL of MeCN was added 330 mg of  $Me_3OBF_4$  (2.25 mmol). Within 1h all of the solid material had dissolved and the solution was bright red. After stirring overnight, the reaction mixture was concentrated and cooled to  $-20\text{ }^\circ\text{C}$ . After several days, red crystals formed. The product was isolated by removal of the mother liquor under a dynamic vacuum; the residue was washed with diethyl ether, and dried under vacuum.  $^1\text{H}$  NMR characterized the product as a  $[Mo_2(O_2CCH_3)((N^iPr)_2CC\equiv CPh)(CH_3CN)_4](BF_4^-)_2$  species. Full characterization of this product was deferred since it was not the target complex.

Method B: 0.16 mL of N,N'-di-*iso*-propylcarbodiimide (1.0 mmol) was dissolved in approximately 25 mL of THF and cooled to  $0\text{ }^\circ\text{C}$ . 5 mL of 1.0 M lithium phenylacetylide (1.0 mmol) in THF was added to the mixture. The solution was allowed to warm slowly to room temperature. After stirring overnight, it was used *in situ* for the next reaction. A solution of 0.475 g of  $[Mo_2(CH_3CN)_{10}]^{4+}(BF_4^-)_4$ , (0.5 mmol) in approximately 25 mL of  $CH_3CN$  was made and cooled to  $0\text{ }^\circ\text{C}$ . The *in situ* solution was cooled again to  $0\text{ }^\circ\text{C}$ . The *in-situ* solution was slowly added to the solution. The initial color change was gray-black. After stirring at room temperature overnight, the solvent was evaporated under a dynamic vacuum and the residue extracted with approximately 25 mL of hexanes. The solution was filtered over Celite. The filtrate was near colorless with no apparent soluble product.
